# Supplementary material for: Effects of Low-Load Blood Flow Restriction Training on Muscle Anabolism Biomarkers and Thrombotic Biomarkers Compared with Traditional Training in Healthy Adults Older Than 60 Years: Systematic Review and Meta-Analysis
Source: MDPI journal article supplement (doi:10.3390/life14030411), 2024-03-20
Supplement: s1 [file s1]

## LOW-LOAD BFR versus LOW LOAD

### A. Leave-one-out sensitivity analysis

**Omitting Study**

Omitting Yasuda 2015b A

Omitting Yasuda 2015a A

Omitting Yasuda 2015a B

Omitting Yasuda 2015b B

Omitting Shimizu 2016

Omitting Lopes 2022

**Random effects model**

**Standardised Mean Difference**

Favours Low-Load Favours Low-Load BFR

| Omitting Study              | SMD   | [95% CI]      | I <sup>2</sup> |
|-----------------------------|-------|---------------|----------------|
| Omitting Yasuda 2015b A     | -0.11 | [-0.48; 0.25] | 0%             |
| Omitting Yasuda 2015a A     | -0.06 | [-0.53; 0.41] | 0%             |
| Omitting Yasuda 2015a B     | -0.05 | [-0.53; 0.43] | 0%             |
| Omitting Yasuda 2015b B     | -0.03 | [-0.53; 0.47] | 0%             |
| Omitting Shimizu 2016       | 0.05  | [-0.49; 0.59] | 0%             |
| Omitting Lopes 2022         | 0.09  | [-0.27; 0.44] | 0%             |
| <b>Random effects model</b> |       |               | <b>0%</b>      |

### B. Publication bias

**|Z|-score**

LFK index 0.83

Standardised Mean Difference

**Standard Error**

Standardised Mean Difference

| Omitting Study              | Standardised Mean Difference | SMD  | [95% CI]      | $I^2$     |
|-----------------------------|------------------------------|------|---------------|-----------|
| Omitting Yasuda 2014 B      |                              | 0.10 | [-0.89; 1.09] | 0%        |
| Omitting Yasuda 2016 A      |                              | 0.11 | [-0.92; 1.13] | 0%        |
| Omitting Yasuda 2016 B      |                              | 0.38 | [-0.05; 0.81] | 0%        |
| Omitting Yasuda 2014 A      |                              | 0.20 | [-0.95; 1.35] | 3%        |
| <b>Random effects model</b> |                              |      |               | <b>0%</b> |

-1   -0.5   0   0.5   1  
 Favours Passive Control   Favours Low-Load BFR

Figure 1 consists of two plots. The left plot shows the |Z-score| (Y-axis, ranging from 0.0 to 1.2) versus Standardised Mean Difference (X-axis, ranging from -0.2 to 0.4). The plot displays a line with open circles representing the LFK index (0.21). The right plot shows the Standard Error (Y-axis, ranging from 0.0 to 0.4) versus Standardised Mean Difference (X-axis, ranging from -2 to 2). The plot displays three shaded regions representing different significance levels:  $p < 0.1$  (darkest gray),  $p < 0.05$  (medium gray), and  $p < 0.01$  (lightest gray). The regions are centered around a Standardised Mean Difference of 0.21, which is marked by a vertical dashed line.
