# Supplementary material for: Effects of Low-Load Blood Flow Restriction Training on Muscle Anabolism Biomarkers and Thrombotic Biomarkers Compared with Traditional Training in Healthy Adults Older Than 60 Years: Systematic Review and Meta-Analysis
Source: MDPI journal article supplement (doi:10.3390/life14030411), 2024-03-20
Supplement: s1 [file s1]

**Figure S1.** Risk of bias summary and graph.

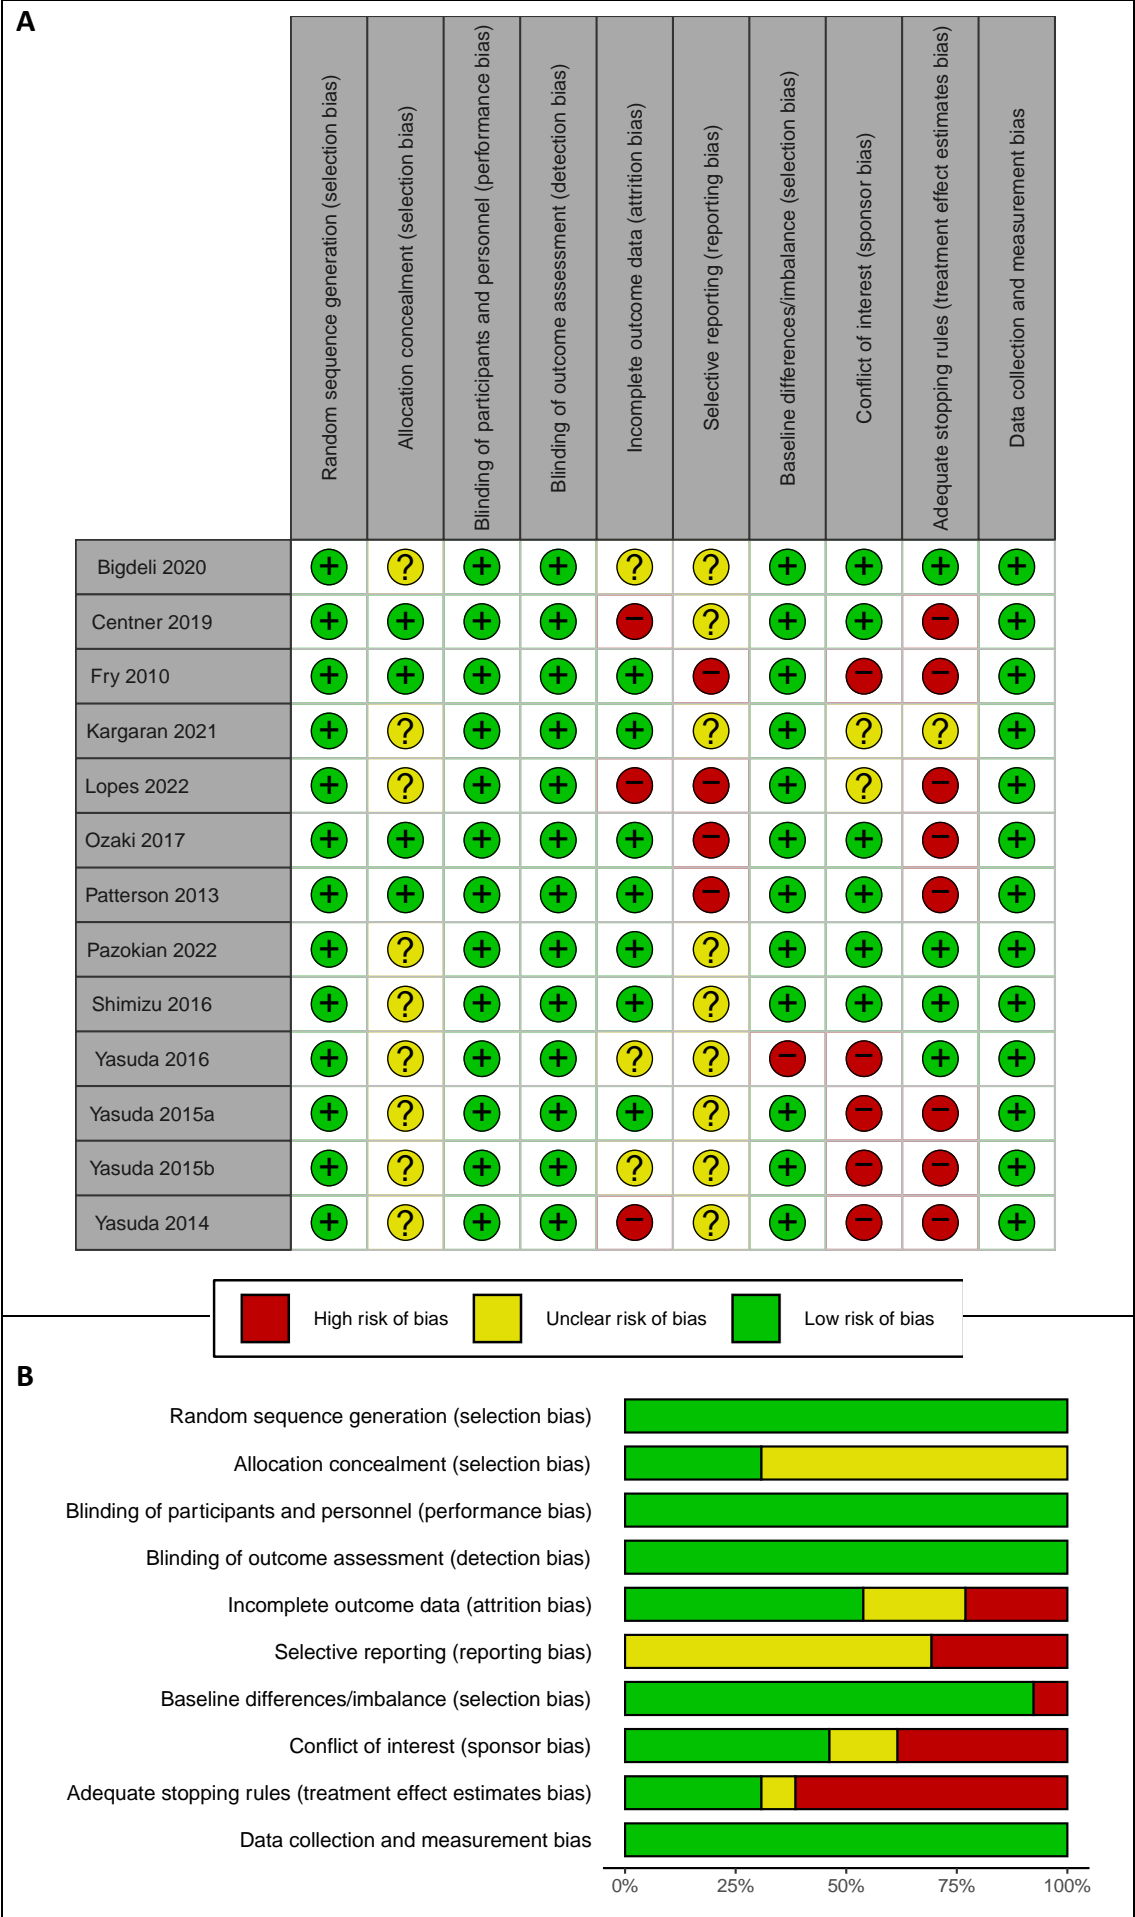

**A.** Risk of bias summary: review authors' judgements about each Risk of bias item for each included study.  
**B.** Risk of bias graph: review authors' judgements about each Risk of bias item presented as percentages across all included studies. [45–47,49–57]
