# Supplementary figures and images for: Effects of Low-Load Blood Flow Restriction Training on Muscle Anabolism Biomarkers and Thrombotic Biomarkers Compared with Traditional Training in Healthy Adults Older Than 60 Years: Systematic Review and Meta-Analysis
Source: MDPI journal article supplement (doi:10.3390/life14030411), 2024-03-20

## LOW-LOAD BFR versus LOW LOAD

## Standardised Mean

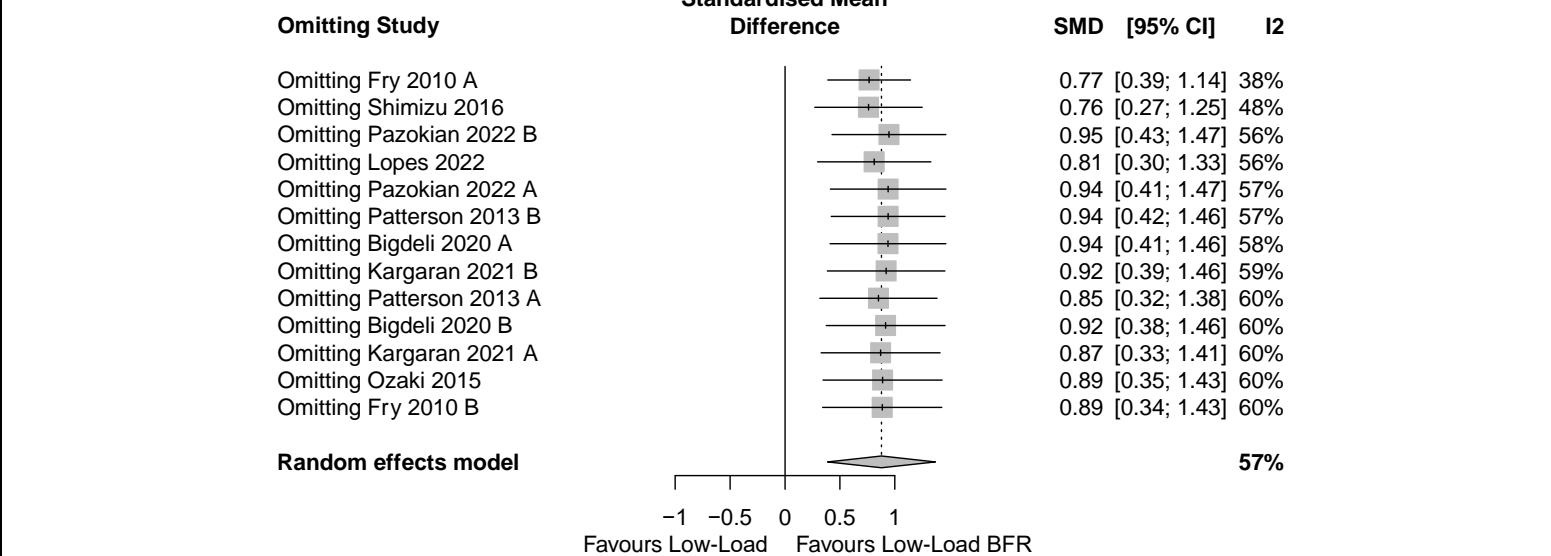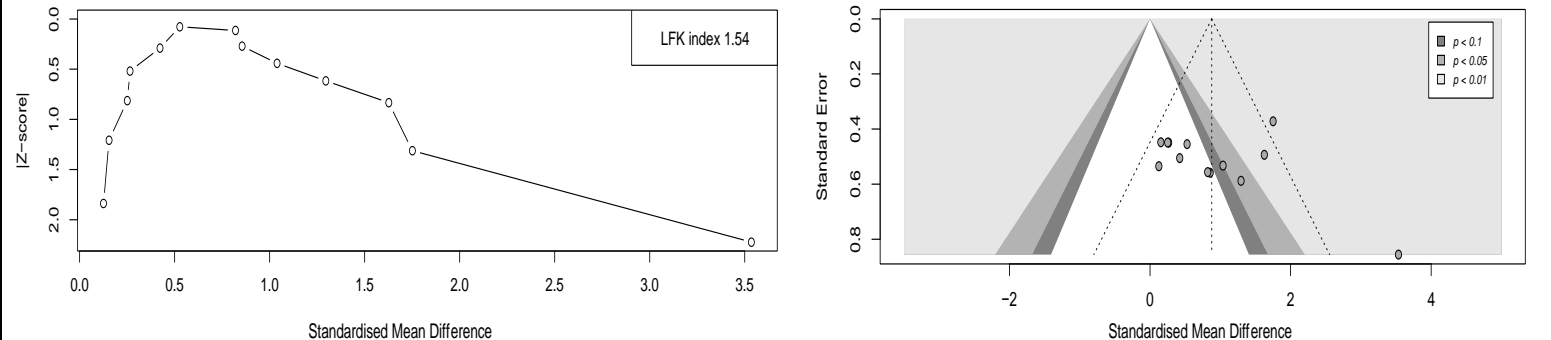

|  | Standardized Mean |
|--|-------------------|
|--|-------------------|

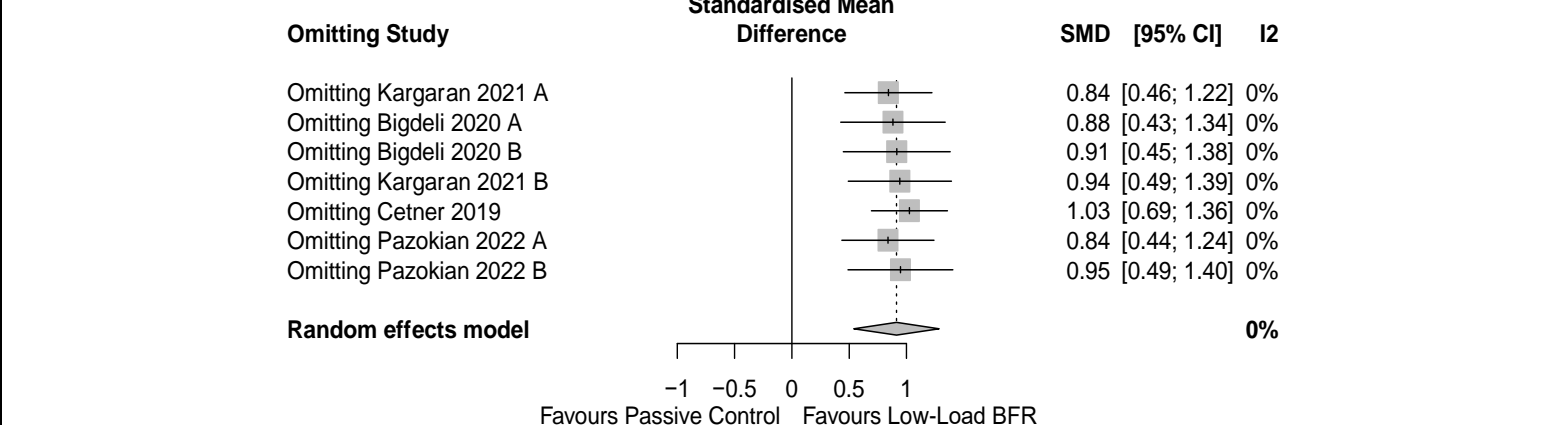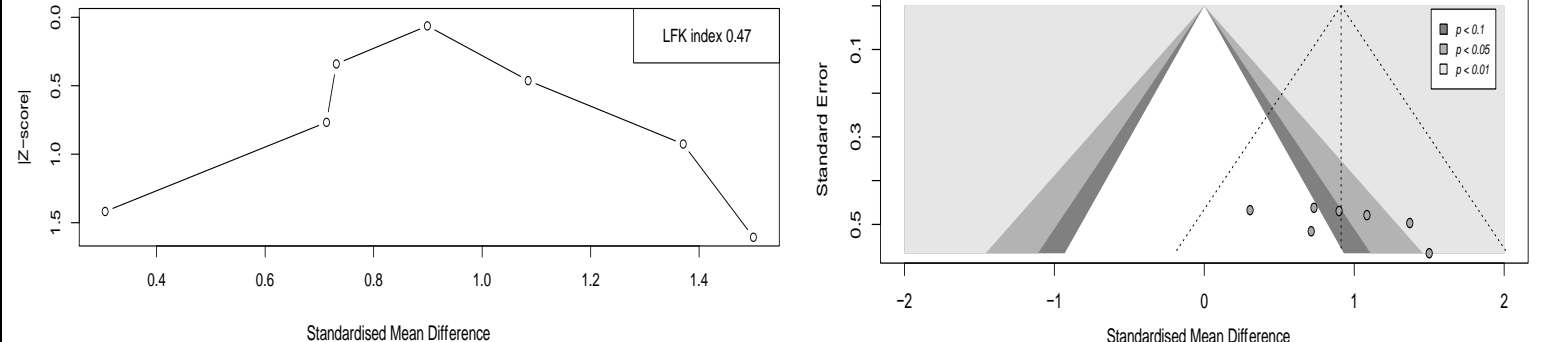

Supplement: s1 [file s1]
